# Supplementary material for: Biohybrid plants with electronic roots via in vivo polymerization of conjugated oligomers
Source: Royal Society of Chemistry journal article supplement (doi:10.1039/d1mh01423d), 2021-01-01
Supplement: d1mh01423d2.pdf [file d1mh01423d2.pdf]

## Supplementary information

### Biohybrid plants with electronic roots via *in-vivo* polymerization of conjugated oligomers

*Daniela Parker<sup>1</sup>, Yohann Daguerre<sup>2</sup>, Gwennael Dufil<sup>1</sup>, Daniele Mantione<sup>3</sup>, Eduardo Solano<sup>4</sup>, Eric Cloutet<sup>3</sup>, Georges Hadziioannou<sup>3</sup>, Torgny N  sholm<sup>2</sup>, Magnus Berggren<sup>1,5</sup>, Eleni Pavlopoulou<sup>6</sup>, Eleni Stavrinidou<sup>1,2,5\*</sup>*

#### UV-VIS spectroscopy on roots

16 mg of freeze-dried root material, treated with ETE-S for 72 h and without treatment (control roots) were placed in a mortar with 3 mL of DMSO. The samples were mechanically crushed for 10 min until the root samples were homogenized in DMSO. Treated root extract exhibits a pale rose color while the control root shows no specific coloration after the extraction. The solutions were then left to settle for 6 h and the supernatant was collected for UV-Vis spectroscopy measurements. The spectra were acquired using a Lambda 900 Perkin Elmer Absorption spectrometer with a resolution of 5 nm from 300 to 900 nm. To obtain the ETE-S contribution on the treated root extract we subtracted the spectra of the untreated root extract from the treated root extract. The characteristic peaks of the ETE-S and undoped p(ETE-S) are observed showing that the root contains both polymer and monomer after ETE-S treatment.

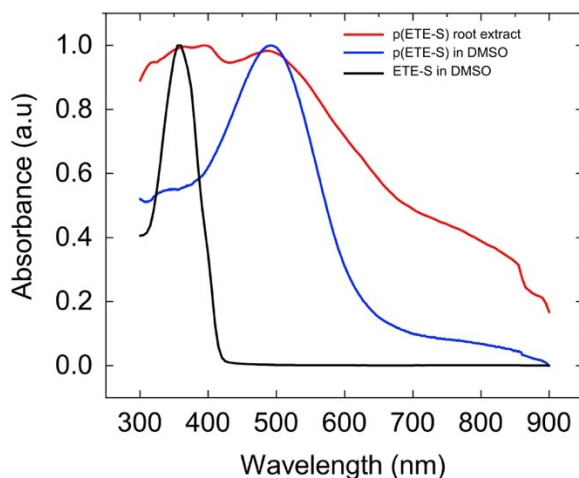

**Figure S1:** UV-Vis spectra of p(ETE-S) root homogenized in DMSO (tissue contribution subtracted) in red, *in vitro* enzymatically polymerized p(ETE-S) dissolved in DMSO in blue, and ETE-S dissolved DMSO in black.

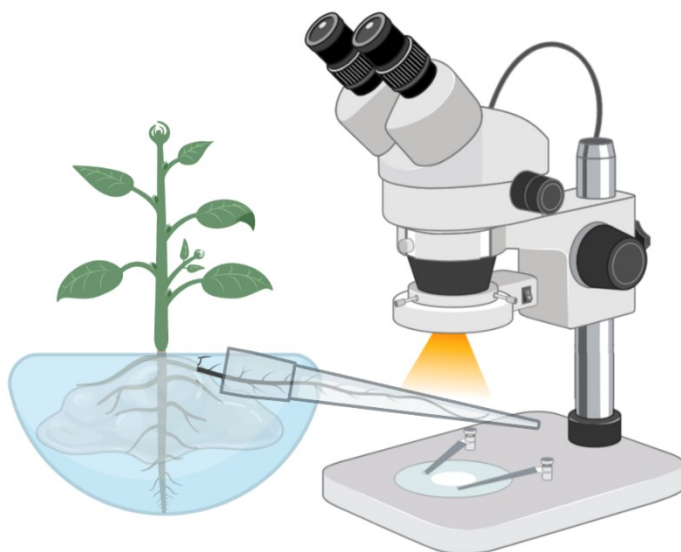

**Figure S2:** Schematic of the experimental set-up for monitoring in-situ the ETE-S polymerization on the root that is still attached on the plant using timelapse microscopy.

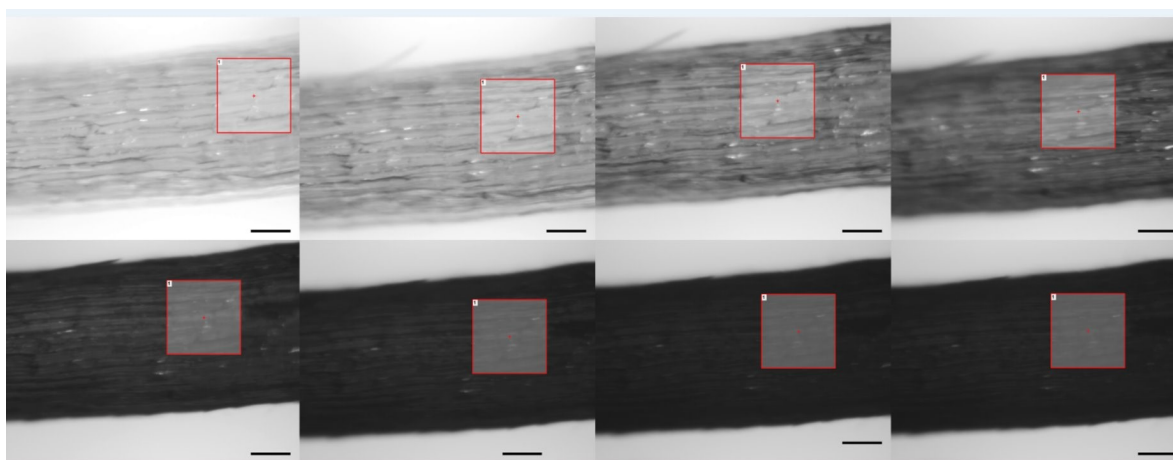

**Figure S3:** Selected micrographs of root during ETE-S polymerization at different times converted to greyscale. Red square shows the selected region of interest (ROI) for analyzing the ETE-S polymerization kinetics as shown in Figure 1C, (scalebar 100mm).

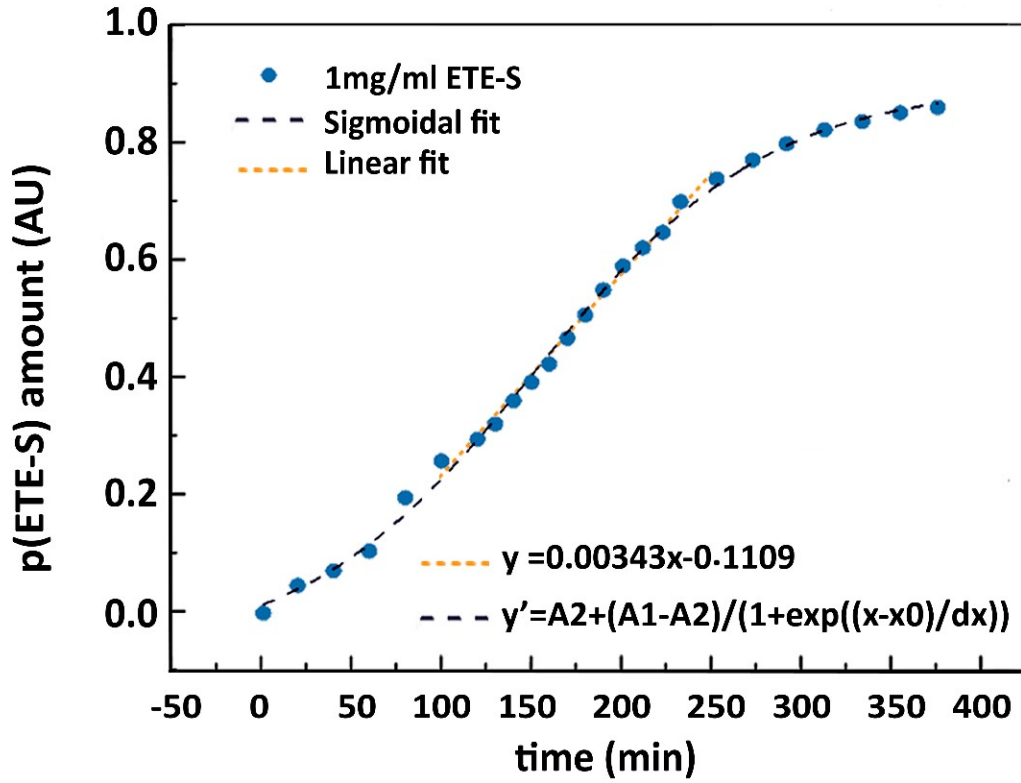

**Figure S4:** Temporal evolution of p(ETE-S) amount on the root with an overall sigmoidal trend, and a linear trend from 100 to 250 min. Linear fit has a  $R^2 = 0.9898$ . For the Sigmoidal fit:  $A1 = -0.072 \pm 0.021$ ,  $A2 = 0.899 \pm 0.0120$ ,  $x0 = 152.345 \pm 2.977$ ,  $dx = 65.199 \pm 3.329$  with  $R^2 = 0.9977$ .

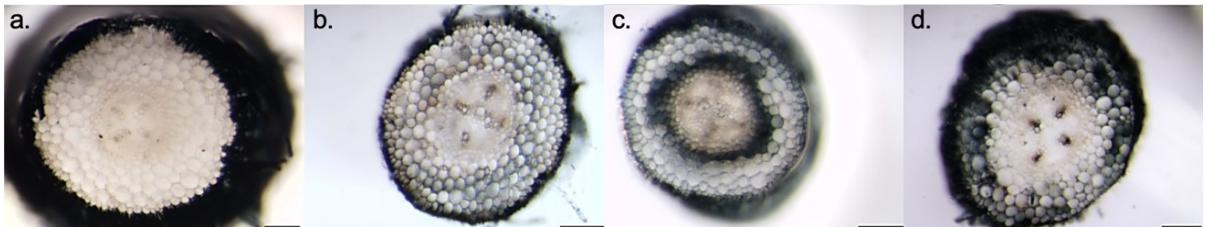

**Figure S5:** a) Transversal cross section of p(ETE-S) root. Transversal cross sections of wounded roots with p(ETE-S) on ground and vascular tissue b) on the cortex, c) on the pericycle, d) on the cortex and xylem. (Scalebar 100μm)

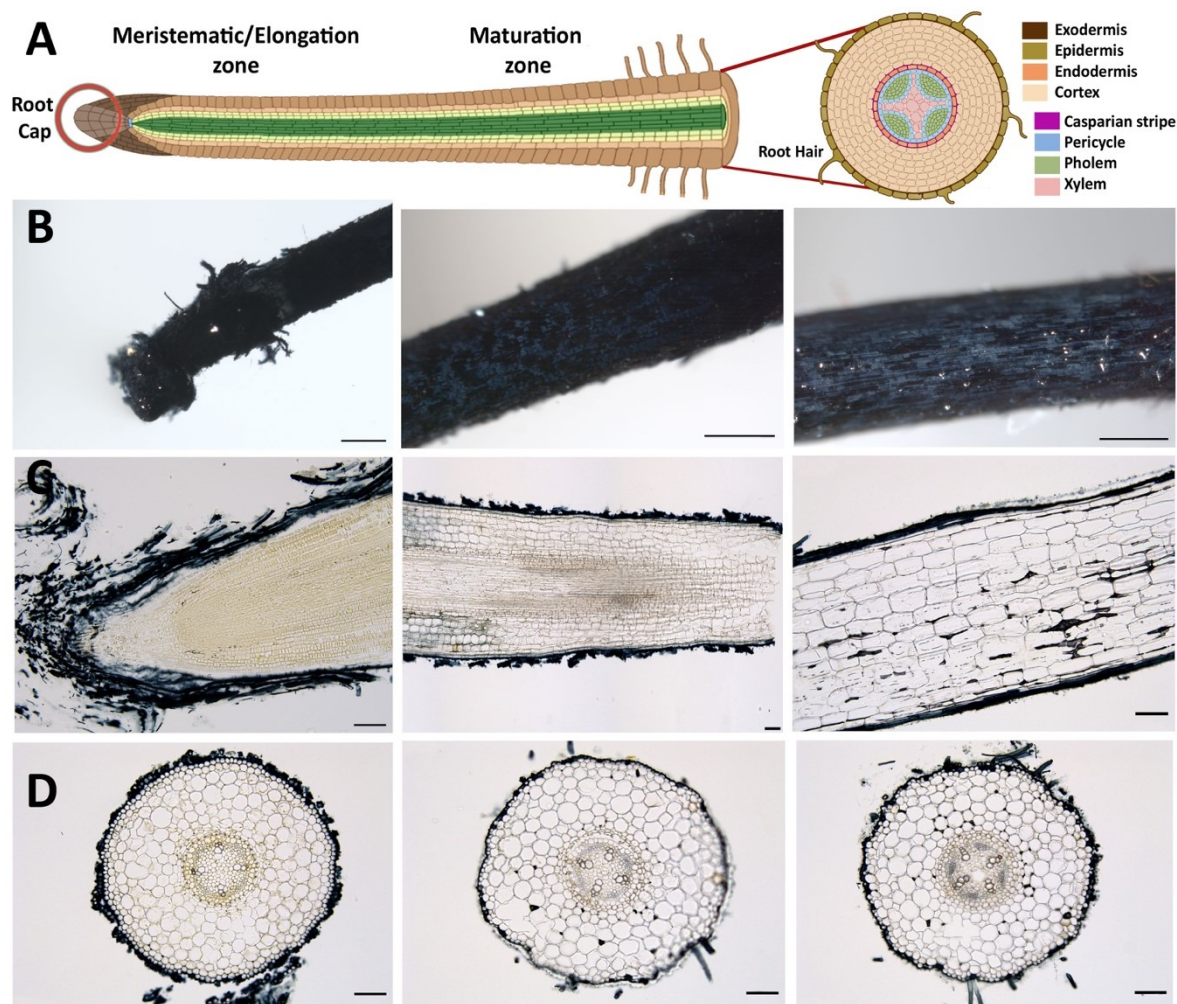

**Figure S6: Root functionalized with  $2 \text{ mg ml}^{-1}$  of ETE-S for 3 days.** A) Schematic of root anatomy indicating the various tissues and developmental zones. p(ETE-S) fixed root micrographs for B) plane view (scalebar  $500\mu\text{m}$ ) C) longitudinal cross section, (scalebar  $100\mu\text{m}$ ) and D) transversal cross (scalebar  $100\mu\text{m}$ ). In B-D first column corresponds to meristematic/elongation zone while second and third column to the maturation zone of the root.

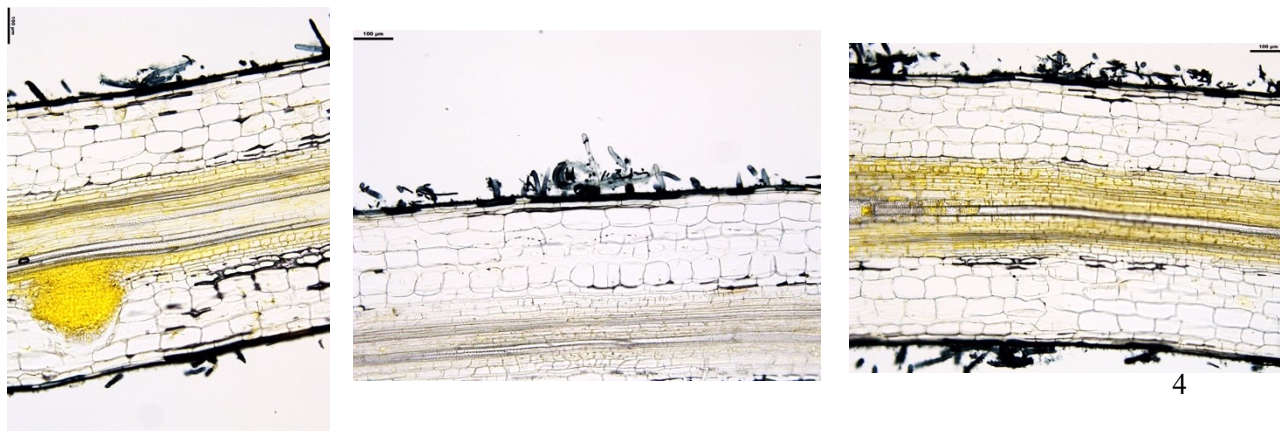



**Figure S7:** Longitudinal cross sections of functionalized bean root for 3 days in  $2\text{mg ml}^{-1}$  ETE-S fixed with PFA. The micrographs show that the root hairs are coated with P(ETE-S).

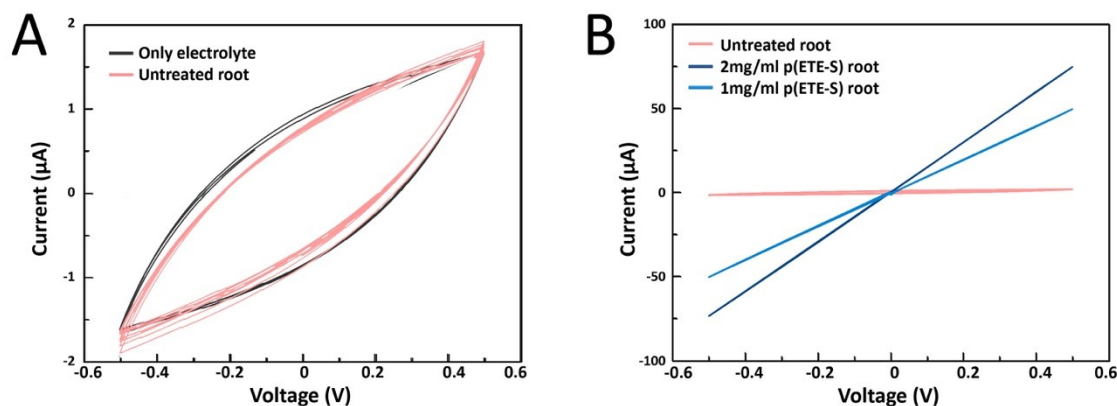

**Figure S8:** A) IV curve of untreated bean root with 20mm interelectrode distance (red) compared with the electrolytic contribution measured with and carbon fiber probes (black). B) IV curves of p(ETE-S) roots treated with 1 and 2mg/ml ETE-S.

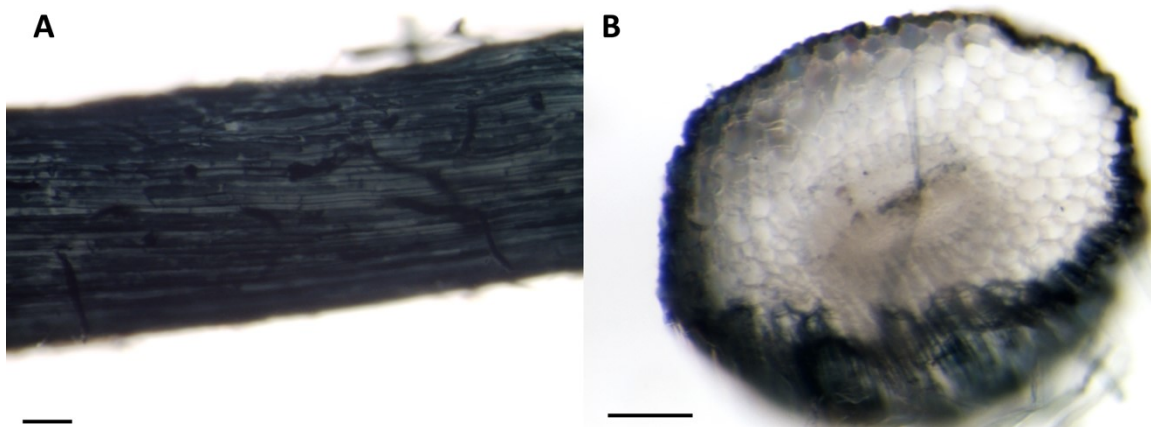

**Figure S9:** A) Plane view and B) cross section of a Pea plant (*Pisum sativum*) root functionalized with  $1\text{mg ml}^{-1}$  ETE-S solution. ETE-S polymerized on the root forming a polymer coating on the root epidermis. For the functionalization the same methodology was used as for bean plant roots (see methods section). Scale bar  $100\mu\text{m}$ .

| Current ( $\mu\text{A}$ ) | Capacitance (mF) | ESR ( $\text{K}\Omega$ ) |
|---------------------------|------------------|--------------------------|
| <b>5</b>                  | 8.07             | 1.8                      |
| <b>10</b>                 | 6.54             | 1.75                     |
| <b>20</b>                 | 5.34             | 1.89                     |
| <b>30</b>                 | 4.89             | 1.8                      |
| <b>40</b>                 | 4.36             | 1.5                      |
| <b>50</b>                 | 3.95             | 1.3                      |

**Table S1:** Capacitance and ESR values calculated from galvanostatic charge/discharge measurements on root supercapacitor.
